# Supplementary material
Source: HighWire-hosted journal article supplement (https://ijgc.bmj.com/highwire/filestream/23367/field_highwire_adjunct_files/0/ijgc-2022-003434supp001_data_supplement.pdf)
Supplement: ijgc-2022-003434supp001_data_supplement.pdf [file ijgc-2022-003434supp001_data_supplement.pdf]

**Supplementary table 1. Specific material needed for carrying out the procedure**

| No. | Items                                             |
|-----|---------------------------------------------------|
| 1   | Non-absorbable Polymer Ligating Clips (Hem-o-lok) |
| 2   | Disposable pocket                                 |
